# Supplementary material for: Exogenous Methyl Jasmonate and Salicylic Acid Induce Subspecies-Specific Patterns of Glucosinolate Accumulation and Gene Expression in Brassica oleracea L
Source: PubMed Central journal article supplement (PMC6273115; doi:10.3390/molecules21101417), 2016-10-24
Supplement: molecules-21-01417-s001.pdf [file molecules-21-01417-s001.pdf]

## Supplementary Materials: Exogenous Methyl Jasmonate and Salicylic Acid Induce Subspecies-Specific Patterns of Glucosinolate Accumulation and Gene Expression in *Brassica oleracea* L.

Go-Eun Yi, Arif Hasan Khan Robin, Kiwoung Yang, Jong-In Park, Byung Ho Hwang and Ill-Sup Nou

**Table S1.** Principal component analysis (PCA) for glucosinolate contents and relative expression of indolic transcription factor-related genes in three subspecies of *B. oleracea* in control, MeJA-treated and SA-treated plants. PC, principal component; *P*, statistical significance.

| Variable                          | PC1                  | PC2          | PC3          | PC4          | PC5          |
|-----------------------------------|----------------------|--------------|--------------|--------------|--------------|
| GBS                               | -0.023               | 0.560        | -0.079       | -0.506       | 0.509        |
| MGBS                              | 0.251                | -0.018       | -0.327       | 0.706        | 0.499        |
| NGBS                              | 0.427                | 0.174        | 0.138        | 0.122        | -0.468       |
| MYB34 (Bol017062)                 | 0.236                | 0.536        | -0.213       | 0.068        | -0.020       |
| MYB34 (Bol007760)                 | 0.445                | 0.283        | 0.104        | 0.024        | -0.187       |
| MYB34 (Bol036262)                 | 0.221                | -0.226       | 0.650        | -0.045       | 0.434        |
| MYB51 (Bol013207)                 | 0.307                | -0.352       | -0.426       | -0.401       | -0.093       |
| MYB51 (Bol030761)                 | 0.384                | -0.333       | -0.336       | -0.227       | 0.185        |
| MYB122 (Bol015939)                | 0.459                | -0.052       | 0.308        | -0.102       | 0.079        |
| %variation explained              | 42.8                 | 19.5         | 14.4         | 10.1         | 6.6          |
| <i>p</i> (subspecies)             | <0.01                | 0.46         | <0.01        | <0.01        | 0.64         |
| <i>p</i> (treatment)              | <0.01                | <0.01        | <0.01        | 0.08         | 0.08         |
| <i>p</i> (subspecies × treatment) | <0.01                | 0.04         | <0.01        | <0.01        | <0.01        |
| Source of Variation               | Mean PC Scores (±Sd) |              |              |              |              |
| Subspecies                        |                      |              |              |              |              |
| Cabbage                           | -0.83 ± 0.28         | 0.12 ± 0.17  | 0.54 ± 0.17  | -0.64 ± 0.16 | 0.10 ± 0.14  |
| Broccoli                          | 1.33 ± 0.28          | -0.17 ± 0.17 | 0.24 ± 0.17  | 0.63 ± 0.16  | 0.001 ± 0.14 |
| Kale                              | -0.49 ± 0.28         | 0.05 ± 0.17  | -0.78 ± 0.17 | 0.01 ± 0.16  | -0.10 ± 0.14 |
| Treatment                         |                      |              |              |              |              |
| Control                           | -0.87 ± 0.28         | -0.60 ± 0.17 | 0.72 ± 0.17  | -0.06 ± 0.16 | -0.23 ± 0.14 |
| MeJA                              | 1.05 ± 0.28          | 1.48 ± 0.17  | -0.15 ± 0.17 | -0.22 ± 0.16 | -0.01 ± 0.14 |
| SA                                | -0.17 ± 0.28         | -0.88 ± 0.17 | -0.56 ± 0.17 | 0.29 ± 0.16  | 0.24 ± 0.14  |
| Subspecies × treatment            |                      |              |              |              |              |
| Cabbage × Control                 | -0.91 ± 0.48         | -0.55 ± 0.31 | 0.75 ± 0.29  | -0.21 ± 0.27 | -0.25 ± 0.25 |
| Cabbage × MeJA                    | -0.74 ± 0.48         | 1.53 ± 0.31  | 0.24 ± 0.29  | -1.26 ± 0.27 | 0.64 ± 0.25  |
| Cabbage × SA                      | -0.84 ± 0.48         | -0.60 ± 0.31 | 0.62 ± 0.29  | -0.45 ± 0.27 | -0.08 ± 0.25 |
| Broccoli × Control                | -0.86 ± 0.48         | -0.62 ± 0.31 | 0.71 ± 0.29  | -0.02 ± 0.27 | -0.24 ± 0.25 |
| Broccoli × MeJA                   | 4.40 ± 0.48          | 0.80 ± 0.31  | 0.59 ± 0.29  | 0.37 ± 0.27  | -0.77 ± 0.25 |
| Broccoli × SA                     | 0.45 ± 0.48          | -0.71 ± 0.31 | -0.58 ± 0.29 | 1.55 ± 0.27  | 1.02 ± 0.25  |
| Kale × Control                    | -0.84 ± 0.48         | -0.62 ± 0.31 | 0.68 ± 0.29  | 0.02 ± 0.27  | -0.19 ± 0.25 |
| Kale × MeJA                       | -0.50 ± 0.48         | 2.10 ± 0.31  | -1.30 ± 0.29 | 0.22 ± 0.27  | 0.08 ± 0.25  |
| Kale × SA                         | -0.13 ± 0.48         | -1.32 ± 0.31 | -1.73 ± 0.29 | 0.29 ± 0.27  | -0.19 ± 0.25 |

**Table S2.** Principal component analysis (PCA) for glucosinolate contents and relative expression of aliphatic transcription factor-related genes in three subspecies of *B. oleracea* in control, MeJA-treated and SA-treated plants. PC, principal component; *p*, statistical significance.

| Variable                          | PC1                         | PC2          | PC3          | PC4          | PC5          |
|-----------------------------------|-----------------------------|--------------|--------------|--------------|--------------|
| GIB                               | -0.130                      | -0.287       | 0.570        | 0.268        | 0.228        |
| PRO                               | 0.486                       | 0.090        | -0.048       | 0.315        | 0.182        |
| GRA                               | 0.021                       | -0.187       | 0.700        | 0.040        | -0.017       |
| SIN                               | 0.458                       | 0.088        | 0.002        | 0.419        | 0.003        |
| GNA                               | 0.487                       | 0.159        | 0.037        | 0.132        | 0.075        |
| MYB28 (Bol007795)                 | 0.283                       | 0.048        | 0.083        | -0.637       | 0.578        |
| MYB28 (Bol036286)                 | -0.329                      | 0.069        | -0.169       | 0.277        | 0.750        |
| MYB28 (Bol017019)                 | -0.229                      | 0.565        | 0.132        | 0.125        | 0.033        |
| MYB28 (Bol036743)                 | -0.205                      | 0.561        | 0.138        | 0.159        | -0.036       |
| MYB29 (Bol008849)                 | 0.131                       | 0.448        | 0.331        | -0.334       | -0.099       |
| %variation explained              | 34.4                        | 22.5         | 16.3         | 9.9          | 7.2          |
| <i>p</i> (subspecies)             | <0.01                       | <0.01        | <0.01        | 0.47         | 0.18         |
| <i>p</i> (treatment)              | 0.24                        | <0.01        | <0.01        | <0.01        | 0.11         |
| <i>p</i> (subspecies × treatment) | 0.02                        | <0.01        | 0.41         | <0.01        | <0.01        |
| <b>Source of Variation</b>        | <b>Mean PC Scores (±Sd)</b> |              |              |              |              |
| <b>Subspecies</b>                 |                             |              |              |              |              |
| Cabbage                           | -0.65 ± 0.21                | -0.99 ± 0.19 | 0.68 ± 0.23  | 0.15 ± 0.18  | 0.26 ± 0.17  |
| Broccoli                          | -1.50 ± 0.21                | 0.55 ± 0.19  | -0.77 ± 0.23 | -0.16 ± 0.18 | -0.16 ± 0.17 |
| Kale                              | 2.16 ± 0.21                 | 0.43 ± 0.19  | 0.09 ± 0.23  | 0.01 ± 0.18  | -0.09 ± 0.17 |
| <b>Treatment</b>                  |                             |              |              |              |              |
| Control                           | 0.16 ± 0.21                 | -0.74 ± 0.19 | -0.78 ± 0.23 | -0.40 ± 0.18 | 0.28 ± 0.17  |
| MeJA                              | -0.29 ± 0.21                | 0.85 ± 0.19  | 0.56 ± 0.23  | 0.68 ± 0.18  | -0.05 ± 0.17 |
| SA                                | 0.13 ± 0.21                 | -0.11 ± 0.19 | 0.21 ± 0.23  | -0.27 ± 0.18 | -0.23 ± 0.17 |
| <b>Subspecies × treatment</b>     |                             |              |              |              |              |
| Cabbage × Control                 | -0.58 ± 0.37                | -1.09 ± 0.33 | -0.32 ± 0.41 | -0.66 ± 0.31 | 0.25 ± 0.30  |
| Cabbage × MeJA                    | -0.88 ± 0.37                | -0.68 ± 0.33 | 1.06 ± 0.41  | 0.92 ± 0.31  | -0.04 ± 0.30 |
| Cabbage × SA                      | -0.50 ± 0.37                | -1.20 ± 0.33 | 1.29 ± 0.41  | 0.19 ± 0.31  | 0.57 ± 0.30  |
| Broccoli × Control                | -0.72 ± 0.37                | -0.83 ± 0.33 | -1.11 ± 0.41 | -1.00 ± 0.31 | 0.07 ± 0.30  |
| Broccoli × MeJA                   | 2.52 ± 0.37                 | 2.97 ± 0.33  | -0.22 ± 0.41 | 0.48 ± 0.31  | 0.41 ± 0.30  |
| Broccoli × SA                     | -1.27 ± 0.37                | -0.46 ± 0.33 | -0.97 ± 0.41 | 0.03 ± 0.31  | -1.00 ± 0.30 |
| Kale × Control                    | 1.78 ± 0.37                 | -0.29 ± 0.33 | -0.90 ± 0.41 | 0.45 ± 0.31  | 0.52 ± 0.30  |
| Kale × MeJA                       | 2.51 ± 0.37                 | 0.26 ± 0.33  | 0.83 ± 0.41  | 0.63 ± 0.31  | -0.53 ± 0.30 |
| Kale × SA                         | 2.18 ± 0.37                 | 1.33 ± 0.33  | 0.33 ± 0.41  | -1.06 ± 0.31 | -0.27 ± 0.30 |

**Table S3.** Principal component analysis (PCA) for glucosinolate contents and relative expression of aliphatic biosynthesis-related genes in three subspecies of *B. oleracea* in control, MeJA-treated and SA-treated plants. PC, principal component; *p*, statistical significance.

| Variable                          | PC1                         | PC2          | PC3          | PC4          | PC5          |
|-----------------------------------|-----------------------------|--------------|--------------|--------------|--------------|
| GIB                               | 0.004                       | -0.136       | -0.550       | -0.142       | -0.117       |
| PRO                               | 0.169                       | 0.463        | 0.078        | -0.275       | 0.086        |
| GRA                               | 0.154                       | -0.022       | -0.498       | 0.201        | -0.254       |
| SIN                               | 0.206                       | 0.445        | 0.067        | -0.043       | 0.054        |
| GNA                               | 0.222                       | 0.436        | 0.100        | -0.131       | 0.032        |
| <i>ST5b</i> (Bol026201)           | -0.120                      | -0.145       | -0.337       | -0.232       | 0.685        |
| <i>ST5b</i> (Bol026202)           | 0.263                       | -0.224       | 0.327        | -0.020       | 0.144        |
| <i>ST5c</i> (Bol030757)           | 0.115                       | -0.374       | 0.305        | -0.162       | 0.128        |
| <i>AOP2</i> (190)                 | 0.382                       | 0.013        | -0.110       | 0.384        | 0.221        |
| <i>AOP2</i> (110)                 | 0.386                       | 0.051        | -0.095       | 0.430        | 0.128        |
| <i>AOP2</i> (240)                 | 0.390                       | -0.059       | -0.106       | 0.009        | 0.242        |
| <i>GSL-OH</i> (Bol033373)         | 0.143                       | -0.283       | 0.170        | 0.219        | 0.006        |
| <i>FMOGS-OX5</i> (Bol029100)      | -0.296                      | 0.202        | -0.120       | 0.065        | 0.439        |
| <i>FMOGS-OX2</i> (Bol010993)      | 0.309                       | -0.193       | -0.019       | -0.449       | 0.095        |
| <i>FMOGS-OX5</i> (Bol031350)      | 0.330                       | -0.061       | -0.199       | -0.421       | -0.280       |
| %variation explained              | 31.0                        | 21.0         | 15.4         | 8.1          | 6.4          |
| <i>p</i> (subspecies)             | <0.01                       | <0.01        | <0.01        | 0.29         | 0.72         |
| <i>p</i> (treatment)              | <0.01                       | <0.001       | 0.72         | 0.11         | <0.01        |
| <i>p</i> (subspecies × treatment) | 0.03                        | 0.02         | <0.01        | <0.01        | 0.79         |
| <b>Source of Variation</b>        | <b>Mean PC Scores (±Sd)</b> |              |              |              |              |
| Subspecies                        |                             |              |              |              |              |
| Cabbage                           | -0.73 ± 0.27                | -0.36 ± 0.24 | -1.42 ± 0.23 | -0.26 ± 0.21 | -0.12 ± 0.21 |
| Broccoli                          | -0.73 ± 0.27                | -1.37 ± 0.24 | 1.06 ± 0.23  | 0.21 ± 0.21  | 0.12 ± 0.21  |
| Kale                              | 1.46 ± 0.27                 | 1.73 ± 0.24  | 0.36 ± 0.23  | 0.04 ± 0.21  | 0.001 ± 0.21 |
| Treatment                         |                             |              |              |              |              |
| Control                           | -1.90 ± 0.27                | 0.76 ± 0.24  | 0.07 ± 0.23  | 0.27 ± 0.21  | 0.55 ± 0.21  |
| MeJA                              | 1.59 ± 0.27                 | -0.54 ± 0.24 | -0.15 ± 0.23 | 0.08 ± 0.21  | 0.06 ± 0.21  |
| SA                                | 0.30 ± 0.27                 | -0.21 ± 0.24 | 0.07 ± 0.23  | -0.36 ± 0.21 | -0.61 ± 0.21 |
| Subspecies × treatment            |                             |              |              |              |              |
| Cabbage × Control                 | -2.14 ± 0.47                | 0.04 ± 0.41  | -0.43 ± 0.40 | 0.49 ± 0.37  | 0.34 ± 0.36  |
| Cabbage × MeJA                    | 1.14 ± 0.47                 | -1.23 ± 0.41 | -1.91 ± 0.40 | -1.31 ± 0.37 | 0.18 ± 0.36  |
| Cabbage × SA                      | -1.20 ± 0.47                | 0.10 ± 0.41  | -1.93 ± 0.40 | 0.03 ± 0.37  | -0.90 ± 0.36 |
| Broccoli × Control                | -2.33 ± 0.47                | -0.05 ± 0.41 | 0.19 ± 0.40  | 0.52 ± 0.37  | 0.55 ± 0.36  |
| Broccoli × MeJA                   | 0.66 ± 0.47                 | -2.34 ± 0.41 | 1.56 ± 0.40  | 0.53 ± 0.37  | 0.20 ± 0.36  |
| Broccoli × SA                     | -0.53 ± 0.47                | -1.72 ± 0.41 | 1.43 ± 0.40  | -0.41 ± 0.37 | -0.39 ± 0.36 |
| Kale × Control                    | -1.23 ± 0.47                | 2.28 ± 0.41  | 0.47 ± 0.40  | -0.18 ± 0.37 | 0.75 ± 0.36  |
| Kale × MeJA                       | 2.97 ± 0.47                 | 1.95 ± 0.41  | -0.11 ± 0.40 | 1.03 ± 0.37  | -0.18 ± 0.36 |
| Kale × SA                         | 2.65 ± 0.47                 | 0.96 ± 0.41  | 0.73 ± 0.40  | -0.71 ± 0.37 | -0.56 ± 0.36 |

**Table S4** HPLC recorded contents of aliphatic and indolic glucosinolates ( $\mu\text{mol}\cdot\text{g}^{-1}$  DW) for each of the three biological replicates of three *B. oleracea* subspecies.

| Subspecies | Treatment | Biological Replicate | GIB      | PRO      | GRA      | SIN      | GNA      | GBS      | MGBS   | NGBS     |
|------------|-----------|----------------------|----------|----------|----------|----------|----------|----------|--------|----------|
| Cabbage    | Control   | 1                    | 0.536355 | 1.291864 | 0.872016 | 0.862    | 0.139747 | 0.72379  | 0.0000 | 0.014813 |
|            |           | 2                    | 0.4      | 0.433606 | 0.620217 | 0.391582 | 0.032803 | 0.820132 | 0.0000 | 0.006809 |
|            |           | 3                    | 0.2      | 0        | 0.299955 | 0.459526 | 0        | 0.432882 | 0.0000 | 0.008033 |
|            | MeJA      | 1                    | 2.222961 | 2.783915 | 1.725882 | 1.809928 | 0.118222 | 10.88554 | 0.0000 | 0.03591  |
|            |           | 2                    | 1.5      | 1.90798  | 0.935985 | 1.370142 | 0.229597 | 5.607139 | 0.0000 | 0.046511 |
|            |           | 3                    | 1.15847  | 2.296198 | 1.154994 | 1.57093  | 0.232905 | 5.220712 | 0.0000 | 0.036303 |
|            | SA        | 1                    | 1.8      | 2.208253 | 2.636135 | 1.43105  | 0.234778 | 1.476323 | 0.0000 | 0.045432 |
|            |           | 2                    | 1.4      | 2.400424 | 1.276082 | 1.168948 | 0.245161 | 1.329414 | 0.0000 | 0.032782 |
|            |           | 3                    | 0.986168 | 2.034036 | 1.334795 | 1.29898  | 0.281532 | 0.897427 | 0.0000 | 0.031859 |
| Broccoli   | Control   | 1                    | 0.1698   | 0.0841   | 0.0889   | 0.2815   | 0.0000   | 0.1278   | 0.0099 | 0.0445   |
|            |           | 2                    | 0.2107   | 0.1363   | 0.0999   | 0.2808   | 0.0000   | 0.6334   | 0.0154 | 0.0651   |
|            |           | 3                    | 0.2073   | 0.0936   | 0.0813   | 0.1737   | 0.0000   | 0.1194   | 0.0105 | 0.0179   |
|            | MeJA      | 1                    | 0.2345   | 0.1021   | 0.0839   | 0.3230   | 0.0000   | 1.5536   | 0.1090 | 3.9393   |
|            |           | 2                    | 0.2478   | 0.0951   | 0.0851   | 0.4878   | 0.0000   | 1.3669   | 0.1318 | 7.2512   |
|            |           | 3                    | 0.2171   | 0.0894   | 0.0574   | 0.3867   | 0.0000   | 1.4716   | 0.1001 | 7.7452   |
|            | SA        | 1                    | 0.3050   | 0.1618   | 0.1584   | 0.1968   | 0.0000   | 0.3838   | 0.2736 | 0.1226   |
|            |           | 2                    | 0.2597   | 0.0903   | 0.1371   | 0.0672   | 0.0000   | 0.1190   | 0.1900 | 0.1177   |
|            |           | 3                    | 0.2608   | 0.1312   | 0.1180   | 0.1411   | 0.0000   | 0.0881   | 0.0992 | 0.0787   |
| Kale       | Control   | 1                    | 0.0919   | 4.6307   | 0.1565   | 2.9566   | 2.1658   | 0.3236   | 0.0182 | 0.0285   |
|            |           | 2                    | 0.1368   | 13.3345  | 0.3005   | 6.6997   | 4.9068   | 0.3015   | 0.0235 | 0.0108   |
|            |           | 3                    | 0.0946   | 4.6599   | 0.1417   | 2.6708   | 1.9893   | 0.1372   | 0.0193 | 0.0107   |
|            | MeJA      | 1                    | 0.9180   | 0.0640   | 4.3761   | 2.7680   | 1.9533   | 5.3585   | 0.0774 | 0.5703   |
|            |           | 2                    | 0.1654   | 10.8301  | 0.4073   | 10.5710  | 3.4643   | 3.7344   | 0.0516 | 0.4629   |
|            |           | 3                    | 0.1520   | 7.7082   | 0.2265   | 5.7825   | 1.2785   | 4.4685   | 0.1052 | 0.1050   |
|            | SA        | 1                    | 0.1620   | 9.0041   | 0.3120   | 3.2888   | 4.0675   | 0.7081   | 0.1381 | 0.1082   |
|            |           | 2                    | 0.0589   | 4.3043   | 1.4655   | 2.3362   | 2.2967   | 0.5198   | 0.0704 | 0.0589   |
|            |           | 3                    | 0.0645   | 3.1352   | 0.0985   | 3.0310   | 1.2408   | 0.1220   | 0.0301 | 0.0390   |

**Table S5.** *B. oleracea* subspecies and varieties/lines used in this study.

| No. | Common Name | Variety     | Sampling Site | Scientific Name             |
|-----|-------------|-------------|---------------|-----------------------------|
| 1   | Cabbage     | Ohganae     | Leaf          | <i>B. oleracea capitata</i> |
| 2   | Broccoli    | Asiaseed 42 | Leaf          | <i>B. oleracea italica</i>  |
| 3   | Kale        | Majjangkale | Leaf          | <i>B. oleracea acephala</i> |

**Table S6.** Primer sequences of 38 glucosinolate biosynthetic-related genes used for relative expression analysis through qPCR under exogenous methyl jasmonate and salicylic acid application [1].

| Gene Name                                       | Accession Number | cDNA Size(bp) | Forward Primer Sequence | Reverse Primer Sequence | Product Size(bp) |
|-------------------------------------------------|------------------|---------------|-------------------------|-------------------------|------------------|
| Transcription factor-related genes (11 genes)   |                  |               |                         |                         |                  |
| MYB28                                           | Bol007795        | 558           | CCACACCAGTTCAGAGAGGT    | GGGAAATGGATCGAAGTCAGC   | 221              |
|                                                 | Bol036286        | 615           | GAAGGTAGCTTGAATGCTAATAC | ATTCATGTAGTGCTCCTCATT   | 249              |
|                                                 | Bol017019        | 426           | GTTGCGGCTAAGGTCATTCT    | CAGAAGTAGCGTTGATCTCATGC | 223              |
| MYB29                                           | Bol036743        | 426           | CTTGGGCGCTGTACATTAC     | ATCGTTCTCCTCGTTGTGGT    | 241              |
|                                                 | Bol008849        | 513           | CGCCAAAGACTTCTGAGTT     | TGATATTGCCCATGGAAGCTG   | 234              |
| MYB34                                           | Bol007760        | 843           | TGAAGGAGGATGGCGTACTC    | CAGTTCGTCGCCCAAATTA     | 203              |
|                                                 | Bol017062        | 951           | AAGGTGGATGGCGTACTCTC    | TGTGAGTGGTTGGATCGACA    | 279              |
| MYB51                                           | Bol036262        | 294           | CCCGAGTTCITTAGCAACC     | TCCAAGTCCAGATCGTCTCT    | 198              |
|                                                 | Bol013207        | 1002          | CCAGAGATTCCAGAGAAGC     | CAAGTCACTGCTACTACTAC    | 233              |
|                                                 | Bol030761        | 990           | CAGACAATATATCGAGTAACG   | TATCATTAAACGGTCACTGG    | 274              |
| MYB122                                          | Bol026204        | 981           | GACCATTCCGAGACATTGCC    | GCATCGTGGATCATGTGGAG    | 284              |
| Aliphatic biosynthesis-related genes (10 genes) |                  |               |                         |                         |                  |
| ST5b                                            | Bol026201        | 1035          | CCGAGCCGTCAGAATCAAG     | GCTATGGCGAAAGTGAGAGC    | 247              |
|                                                 | Bol026202        | 1035          | AAGCCTTGACTTTCGCCATC    | ACTTCACAACCTGAGTCCGGT   | 204              |
| ST5c                                            | Bol030757        | 1014          | CCACGCCCAAAACTTCTTCA    | TGAGTGGAGAAGAGCGTGT     | 246              |
| FMOGS-OX2                                       | Bol010993        | 1386          | GAGAAGGTATCCGAGCCACA    | GTCCACTGCAAAACAACGACT   | 200              |
| FMOGS-OX5                                       | Bol029100        | 1347          | CTTGCTCCAACGCTTTCCTT    | CCTCAGCTCTCCAGTGTCA     | 280              |
| AOP2                                            | Bol031350        | 1380          | GACACTACACAGAGCCTCGT    | CCCCGGGAAGCTTCTCATAT    | 234              |
|                                                 | Bo2g102190       |               | GGAACGTGTCTCCAAAACCC    | TAGCACCATCACCAGCATCA    | 354              |
| GSL-OH                                          | Bo3g052110       |               | CCAGGAAGTGAGAAGTGGGT    | ACCAACATCCGACCAGTAT     | 552              |
|                                                 | Bo9g006240       |               | CCAGGAAGTGAGAAGTGGGT    | TAGCACCATCACCAGCATCA    | 517              |
|                                                 | Bol033373        | 243           | GATTGTGCAAAAGGCTTGT     | AGAGCAITAGGATTAGGAGGA   | 188              |
| Indolic biosynthesis-related genes (17 genes)   |                  |               |                         |                         |                  |
| ST5a                                            | Bol026200        | 1017          | GTCCGGTGTCAAGATGGTIT    | CCTCTCCGGTCTCTTGT       | 214              |
|                                                 | Bol039395        | 1014          | TGCCGTTGTGAAGAGGTTG     | CCCAATCTCCAACCTTCCCT    | 210              |
| CYP81F4                                         | Bol032712        | 1506          | CGGTGGAGGAGAAGGAGAAA    | CTGACACATGGCTCGTAACG    | 226              |
|                                                 | Bol032714        | 960           | ACCCTGGTGAATACTTGCCA    | GAAACACACTGAAGCAGAAC    | 239              |
| CYP81F1                                         | Bol028918        | 1503          | GTTTGGGCATCAGAGACAT     | GAATAGTCCACGCGTTCACC    | 299              |
|                                                 | Bol017375        | 369           | AAGCAGAGCGGTTCAAGAAG    | GCGTGACCAITGTGTACCA     | 204              |
|                                                 | Bol017376        | 246           | CCGTCTCCTTCAACGGTCT     | CGACGTATTTACCGGTGAGC    | 170              |
| Title?                                          | Bol028913        | 1500          | GAGACCTCCGAGTAACCTT     | GTCCTCCGTCGTCITCTAG     | 222              |
|                                                 | Bol028914        | 1497          | CITTCCAACCTGACGGCCAAA   | CGTTAGGTCCGAGAAAAGCG    | 257              |
| CYP81F2                                         | Bol012237        | 933           | GCAGCCGTGACTAGAAATG     | TCCGCCAATCTTGAGGTCTT    | 231              |
|                                                 | Bol014239        | 1482          | TGTACCCGCTTCTCCTTCT     | GACACCATCCTCTGACCCAA    | 238              |
| CYP81F3                                         | Bol026044        | 1482          | TTCTCCTACGTTACGGCTC     | CTACGAACGGAGAGGAGTCC    | 251              |
|                                                 | Bol028919        | 1500          | TAACAGCGGAGGAGAAGACG    | CACCTTCTAACTGGCCTGA     | 260              |
|                                                 | Bol032711        | 1492          | CCGTCTCACCAACTTCTCT     | CTTCTCAAAGCTCCCTCCA     | 292              |
| IGMT1                                           | Bol007029        | 1119          | GTGTTCTCTCACCTCCGA      | GTGTTGAGGAAGACGCTGTC    | 260              |
|                                                 | Bol020663        | 342           | AGATGCCATGATCTTGAACGT   | CCAGCAATGATAAGCCTGACA   | 298              |
| IGMT2                                           | Bol007030        | 1125          | AGCCTTCCCATTGGTCTCA     | TCTCTCGCCCTTCCAAACT     | 223              |

**Table S7.** Physical properties of glucosinolates after mass spectrometry analysis (HPLC/MS, Agilent 1200 series, Agilent Technologies) identified in the leaf samples of *B. oleracea* subspecies by HPLC.

| No. | Retention Time (min) | Names                   | Molecular Weight | Structure             |
|-----|----------------------|-------------------------|------------------|-----------------------|
| 1   | 8.960                | Glucioiberin            | 344              | [M + H] <sup>+</sup>  |
| 2   | 9.365                | Progoitrin              | 310              | [M + H] <sup>+</sup>  |
| 3   | 9.633                | Glucoraphanin           | 358              | [M + H] <sup>+</sup>  |
| 4   | 10.068               | Sinigrin                | 302              | [M + Na] <sup>+</sup> |
| 5   | 12.430               | Glucanapin              | 316              | [M + Na] <sup>+</sup> |
| 6   | 13.385               | Glucioiberin            | 350              | [M + Na] <sup>+</sup> |
| 7   | 13.586               | 4-hydroxyglucobrassicin | 385              | [M + H] <sup>+</sup>  |
| 8   | 15.194               | Glucorucin              | 364              | [M + Na] <sup>+</sup> |
| 9   | 16.250               | Glucobrassicin          | 369              | [M + H] <sup>+</sup>  |
| 10  | 17.138               | 4-methoxyglucobrassicin | 399              | [M + H] <sup>+</sup>  |
| 11  | 19.399               | Neoglucobrassicin       | 399              | [M + H] <sup>+</sup>  |

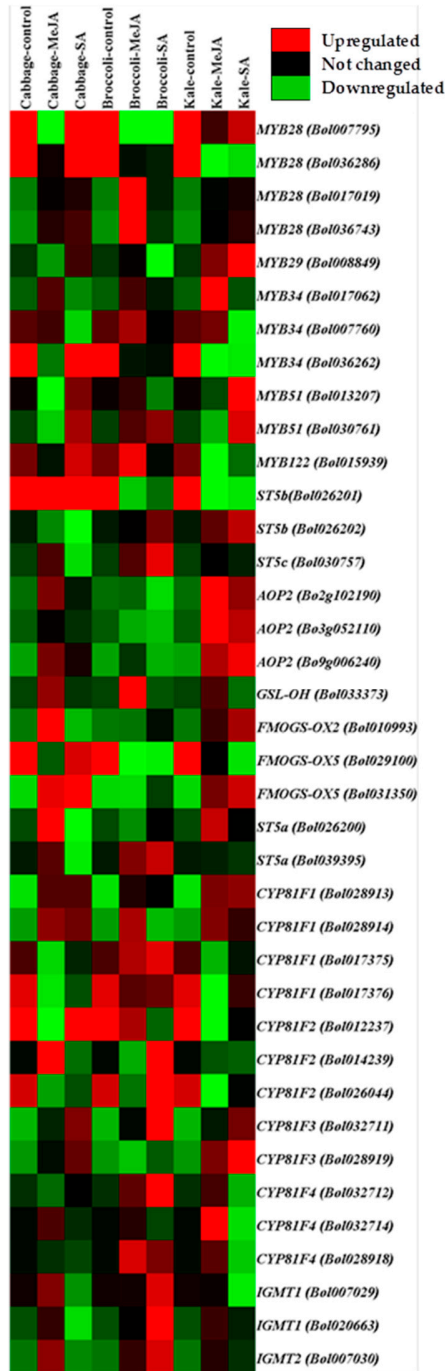

**Figure S1.** Heat map representation of expression pattern of glucosinolate biosynthesis-related genes under exogenous application of MeJA and SA in cabbage, broccoli and kale. Data were the relative expression of glucosinolate biosynthesis-related genes obtained from qPCR analysis.

| Chemical name                          | Common name    | Abbreviations | Chemical structures |
|----------------------------------------|----------------|---------------|---------------------|
| 3-methylthiopropyl glucosinolate       | glucoiberverin | 3MTP          |                     |
| 4-methylthiobutyl glucosinolate        | glucoerucin    | 4MTB          |                     |
| 3-(methylsulfinyl)propyl glucosinolate | glucoiberin    | 3MSOP         |                     |
| 4-(methylsulfinyl)butyl glucosinolate  | glucoraphanin  | 4MSOB         |                     |
| allyl glucosinolate                    | sinigrin       | 3PREY         |                     |
| 3-butenylglucosinolate                 | Gluconapin     | 3BTEY         |                     |
| 4-hydroxybutyl glucosinolate           | progoitrin     | 4OHB          |                     |

(a)

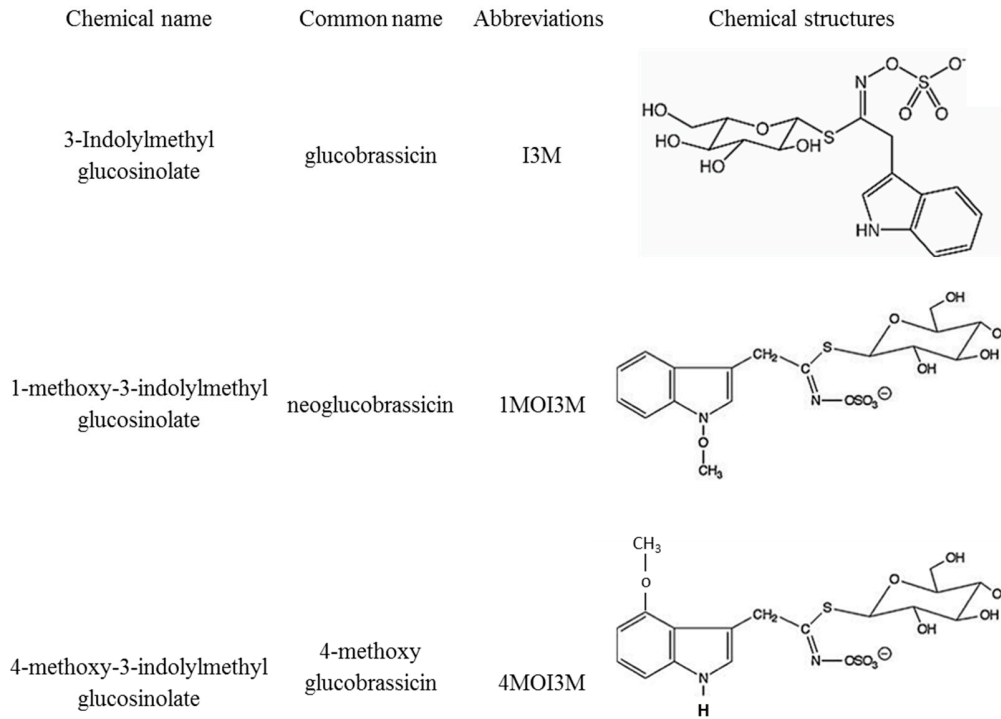

(b)

Figure S2. Chemical structures of the glucosinolate compounds and intermediates. (a) Aliphatic glucosinolates; (b) Indolic glucosinolates.

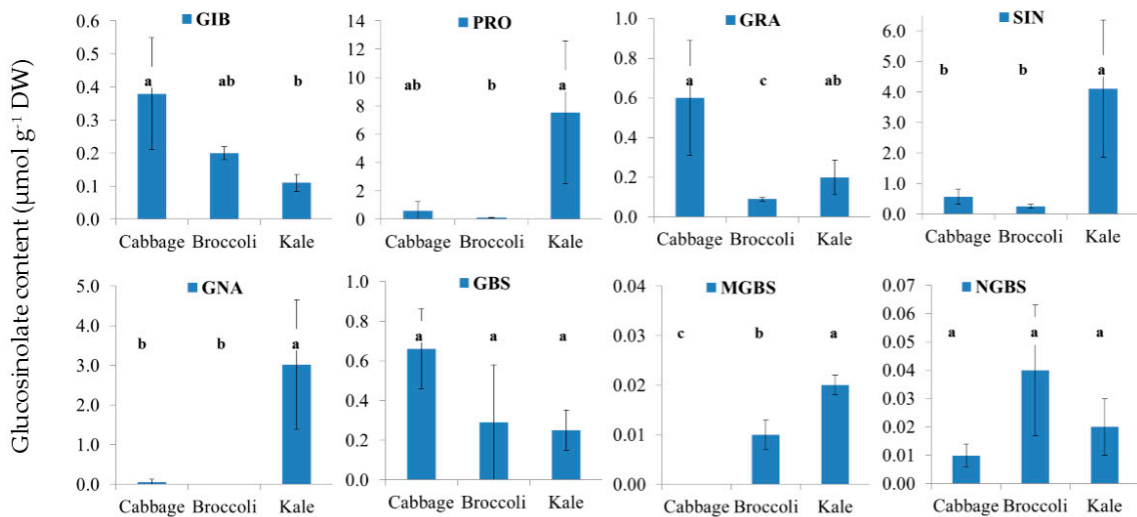

Figure S3. Contents of glucosinolates in control plants cabbage, broccoli and kale.



MYB28 (BoI007795)

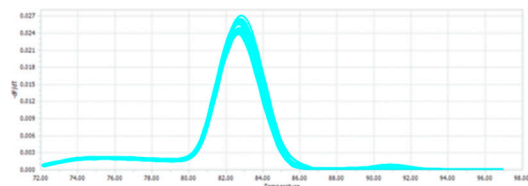

MYB29 (BoI008849)

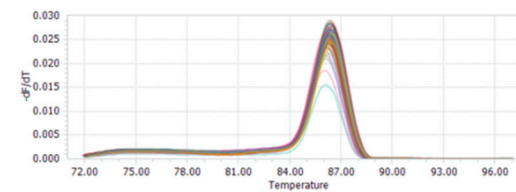

MYB28 (BoI036286)

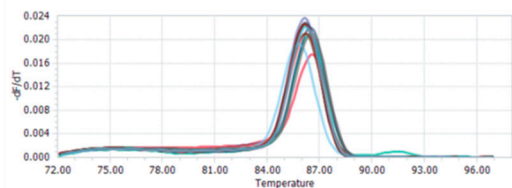

MYB34 (BoI007760)

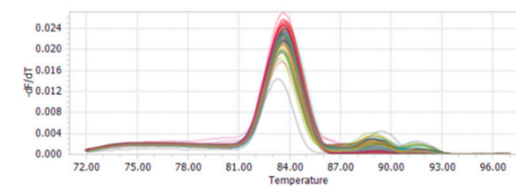

MYB28 (BoI017019)

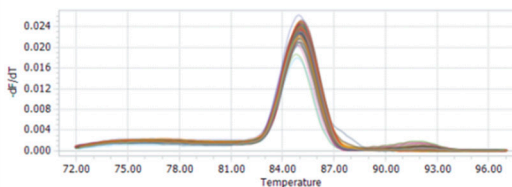

MYB34 (BoI017062)

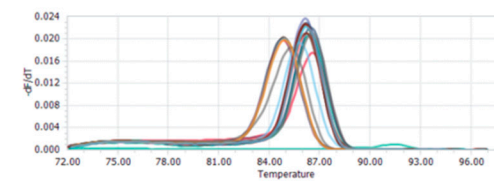

MYB28 (BoI036743)

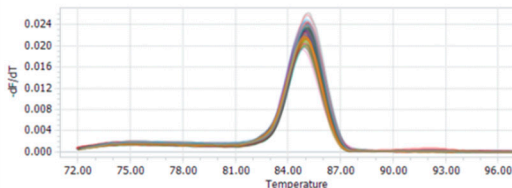

MYB34 (BoI036262)

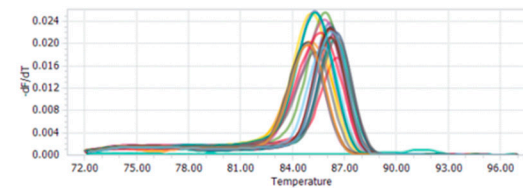

*MYB51* (bol013207)

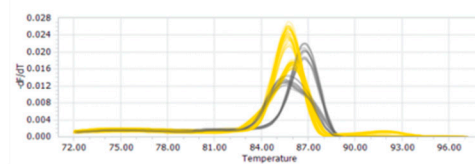

*ST5b* (Bol026202)

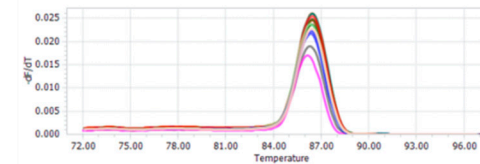

*MYB51* (bol030761)

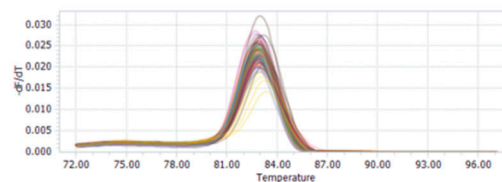

*ST5c* (Bol030757)

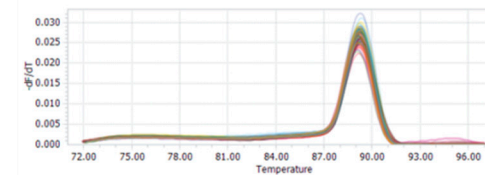

*MYB122* (bol026204)

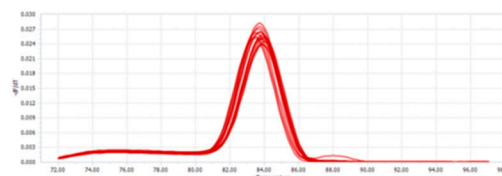

*FMOGS-OX2*  
(Bol010993)

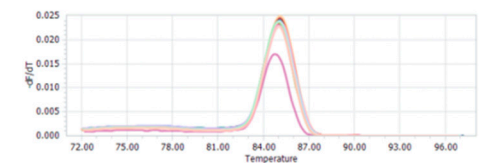

*ST5b* (bol026201)

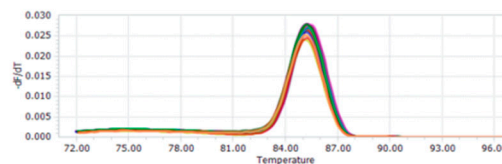

*FMOGS-OX5* (bol029100)

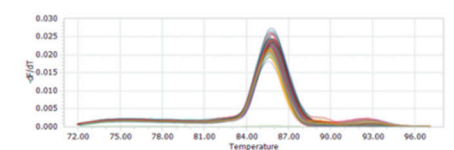

*AOP2* (Bo2g102190)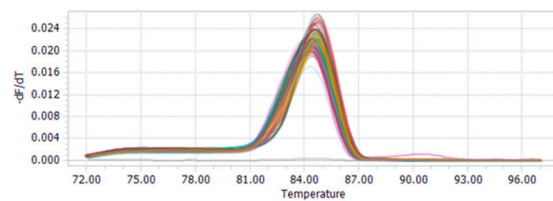*ST5a* (BoI026200)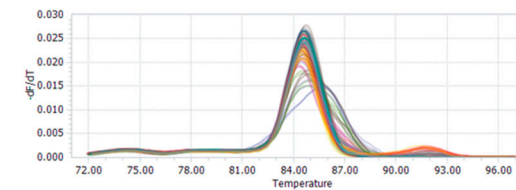*AOP2* (Bo3g052110)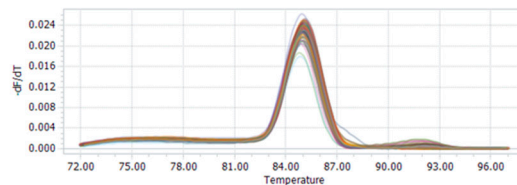*ST5a* (BoI039395)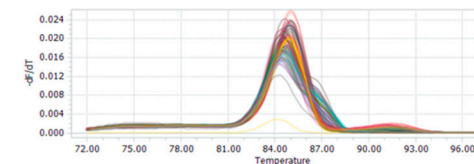*AOP2* (Bo9g006240)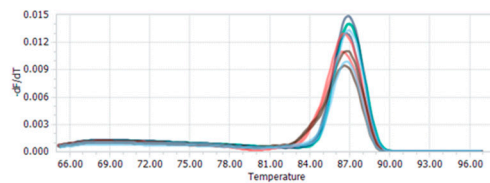*CYP81F4* (BoI032712)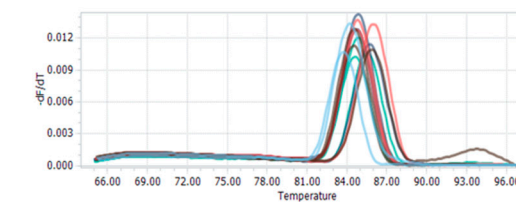*GSL-OH* (BoI033373)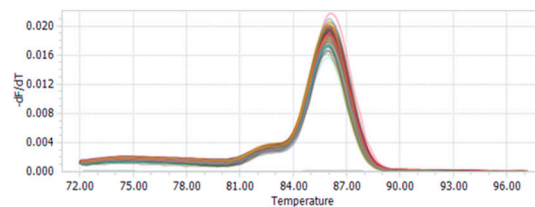*CYP81F4* (BoI032714)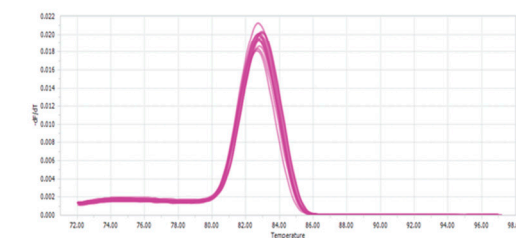

*CYP81F4* (BoI028918)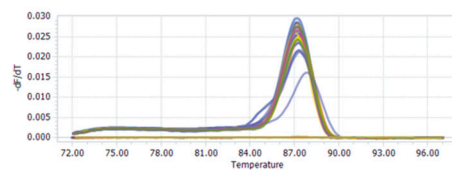*CYP81F1* (BoI028914)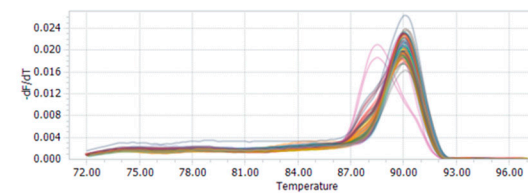*CYP81F1* (BoI017375)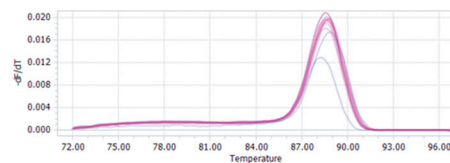*CYP81F2* (BoI012237)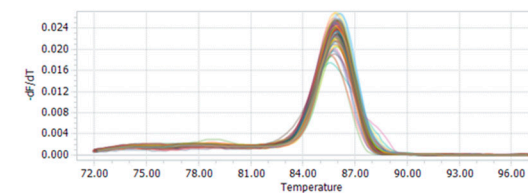*CYP81F1* (BoI017376)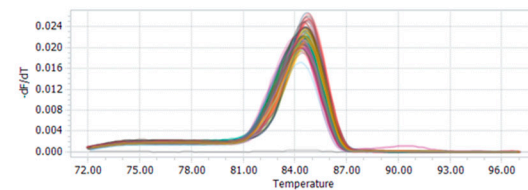*CYP81F2* (BoI014239)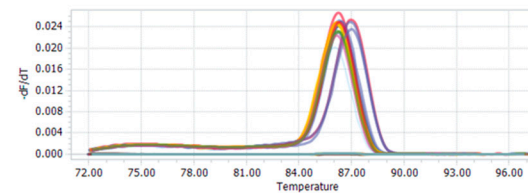*CYP81F1* (BoI028913)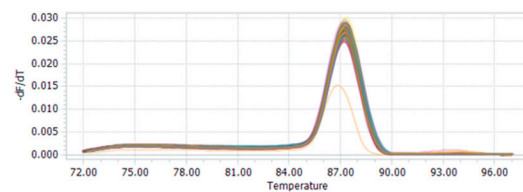*CYP81F2* (BoI026044)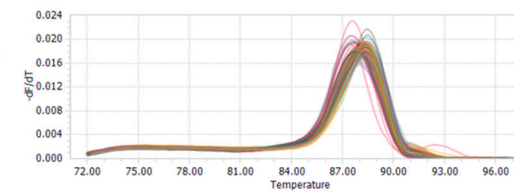

*CYP81F3* (BoI028919)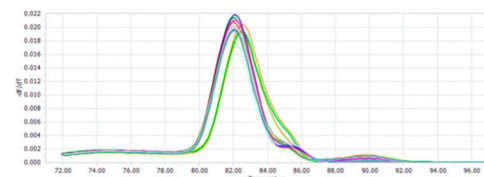*IGMT2* (BoI007030)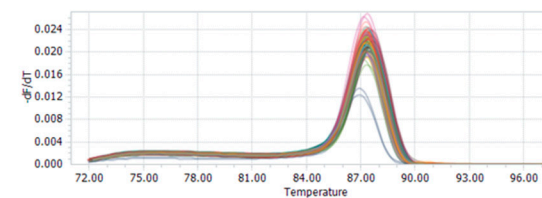*CYP81F3* (BoI032711)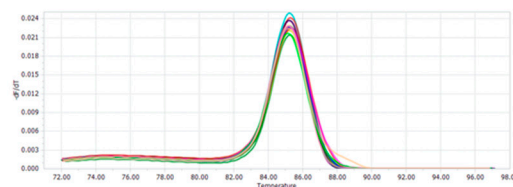*actin*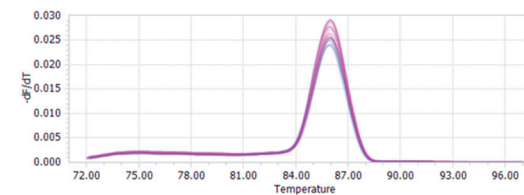*IGMT1* (BoI007029)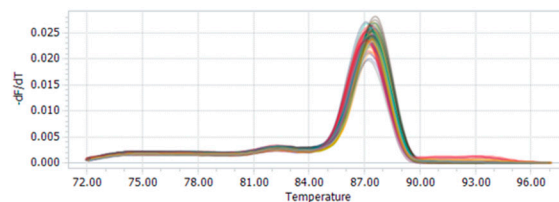*IGMT1* (BoI020663)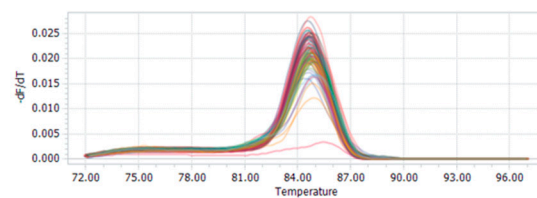

**Figure S4.** Melting curves obtained for 38 glucosinolate biosynthesis related genes and actin.

## Reference

1. Robin, A.H.K.; Yi, G.E.; Laila, R.; Yang, K.; Park, J.I.; Kim, H.R.; Nou, I.S. Expression Profiling of Glucosinolate Biosynthetic Genes in *Brassica oleracea* L. var. capitata Inbred Lines Reveals Their Association with Glucosinolate Content. *Molecules* **2016**, *21*, 787, doi:10.3390/molecules21060787.
